# Supplementary material
Source: publisher figshare collection journal article supplement (https://karger.figshare.com/ndownloader/files/31067686)
Supplement: Supplementary file 1 [file 31067686]

**Table S1.** Demographic characteristics of college students at February, 2020 (T1) versus at January, 2021 (T2)

| **Characteristics** | **T1**  **Participants (n=294)** | **T2**  **Participants (n=285)** | ***p* value** |
| --- | --- | --- | --- |
|  |
| **Age(y), Mean (SD)** | 19.6 ± 1.2 | 19.7 ± 1.1 | 0.330 |
| **Gender, n (%)** |  |  | 0.862 |
| Male | 96 (32.7%) | 95 (33.3%) |  |
| Female | 198 (67.3%) | 190 (66.7%) |  |
| **Grade, n (%)** |  |  | 0.989 |
| 1 | 83 (28.2%) | 79 (27.7%) |  |
| 2 | 100 (34.0%) | 100 (35.1%) |  |
| 3 | 63 (21.4%) | 60 (21.1%) |  |
| 4 | 48 (16.3%) | 46 (16.1%) |  |
| χ2 tests for group differences of categorical variables; Mann-Whitney tests for independent groups on continuous variables. | | | |
